# Supplementary material for: A study of the growth-time effect on graphene layer number based on a Cu–Ni bilayer catalyst system
Source: Royal Society of Chemistry journal article supplement (doi:10.1039/c5ra27075h), 2016-01-01
Supplement: c5ra27075h1.pdf [file c5ra27075h1.pdf]

## SUPPORTING INFORMATION

### **A study of the growth-time effect on graphene layer number based on Cu–Ni bilayer catalyst system**

Tao Wu <sup>a,b</sup>, Zhiduo. Liu <sup>b</sup>, Guoxin. Chen <sup>b</sup>, Dan. Dai <sup>b</sup>, Hongyan. Sun <sup>b</sup>, Wen Dai <sup>b</sup>, Nan Jiang <sup>b,\*</sup>,  
YeHua. Jiang <sup>a,\*</sup>, Cheng.-Te. Lin <sup>b,\*</sup>

<sup>1</sup> *Faculty of Materials Science and Engineering, Kunming University of Science and Technology, Kunming 650093, China*

<sup>2</sup> *Key Laboratory of Marine Materials and Related Technologies, Zhejiang Key Laboratory of Marine Materials and Protective Technologies, Ningbo Institute of Materials Technology and Engineering (NIMTE), Chinese Academy of Sciences, Ningbo 315201, China*

*\*Corresponding author,*

*E-mail: [jiangnan@nimte.ac.cn](mailto:jiangnan@nimte.ac.cn); [jiangyehua@kmust.deu.cn](mailto:jiangyehua@kmust.deu.cn); [linzhengde@nimte.ac.cn](mailto:linzhengde@nimte.ac.cn)*

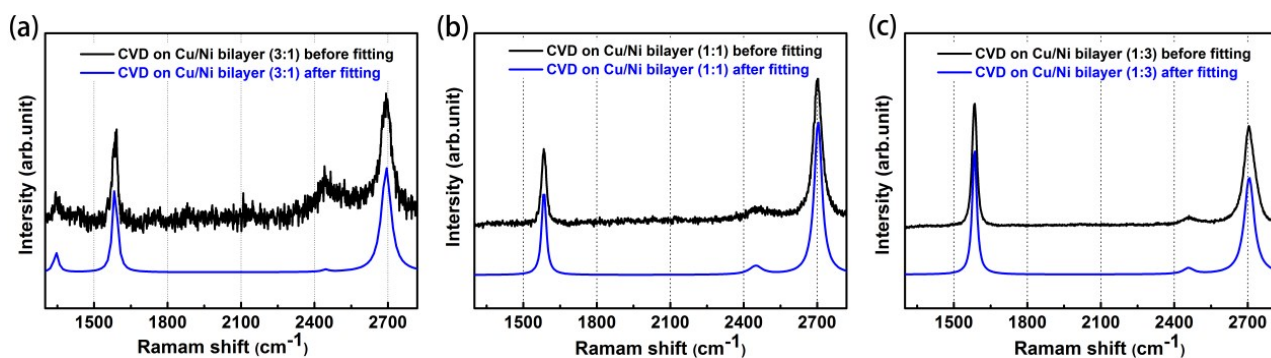

**Figure S1.** (a)–(c) Typical Raman spectra of graphene films grown on bilayer catalysts with various Cu/Ni ratios. The results show the comparison of the original and Gaussian fitted spectra.

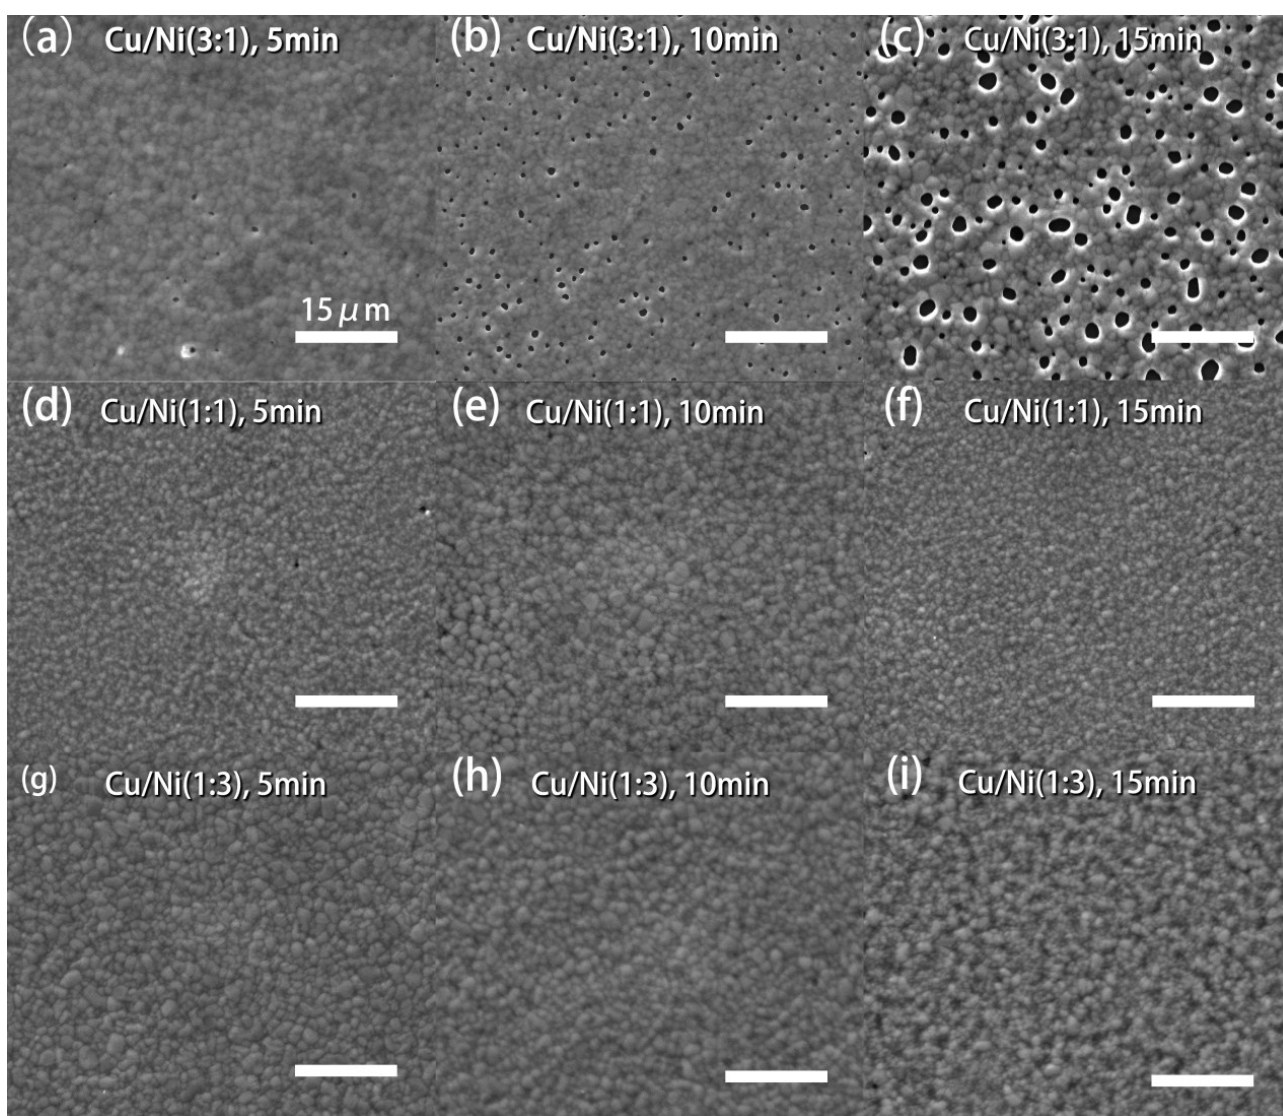

**Figure S2.** The cross-sectional SEM images of Cu–Ni bilayer-coated samples after graphene growth: (a) Cu/Ni = 3:1, 750 °C; (b)–(d) Cu/Ni = 3:1, 900 °C with different growth time; (e) Cu/Ni = 1:1,

750 °C; (f)–(h) Cu/Ni = 1:1, 900 °C with different growth time; (i) Cu/Ni = 1:3, 750 °C; (j)–(l) Cu/Ni = 1:1, 900 °C with different growth time.

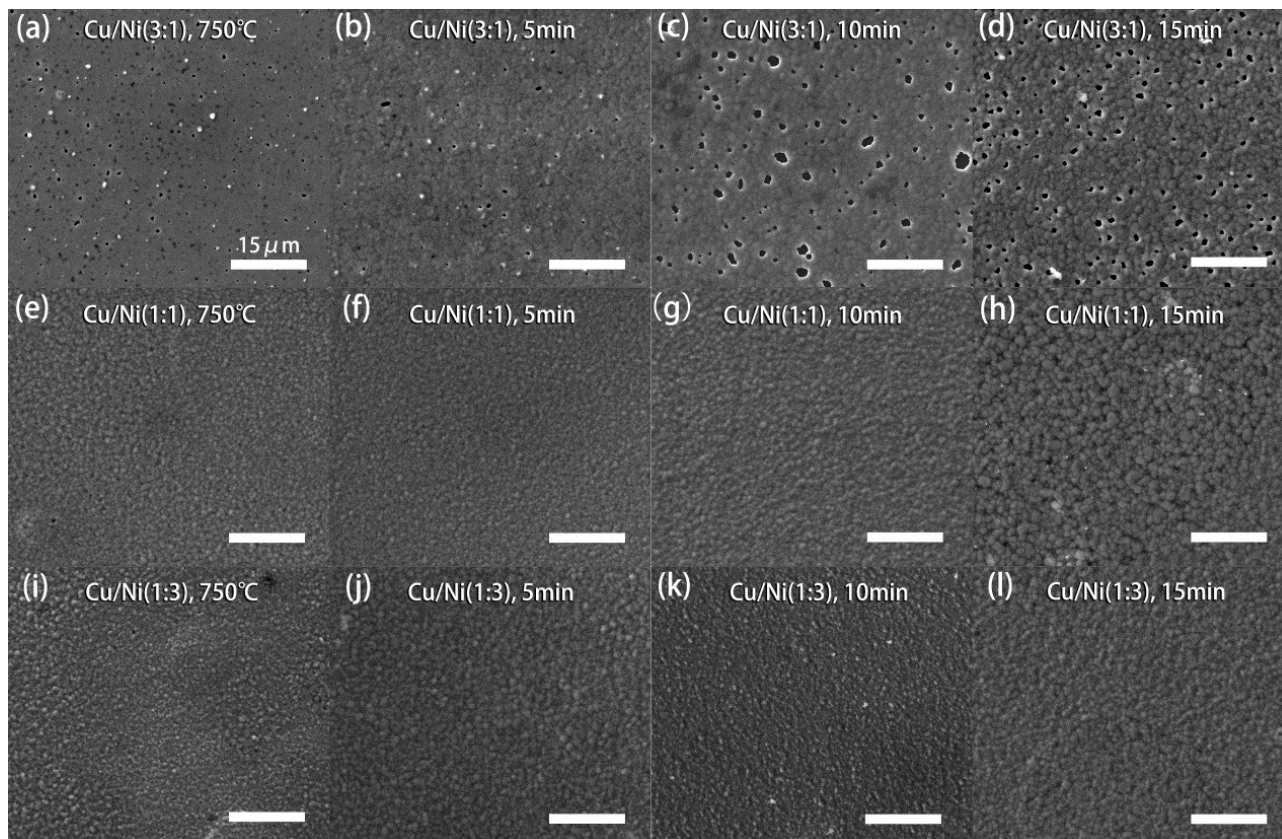

**Figure S3.** The cross-sectional SEM images of Cu–Ni bilayer-coated samples after various thermal treatments without the introduction of methane: (a) Cu/Ni = 3:1, 750 °C; (b)–(d) Cu/Ni = 3:1, 900 °C with different growth time; (e) Cu/Ni = 1:1, 750 °C; (f)–(h) Cu/Ni = 1:1, 900 °C with different growth time; (i) Cu/Ni = 1:3, 750 °C; (j)–(l) Cu/Ni = 1:1, 900 °C with different growth time.

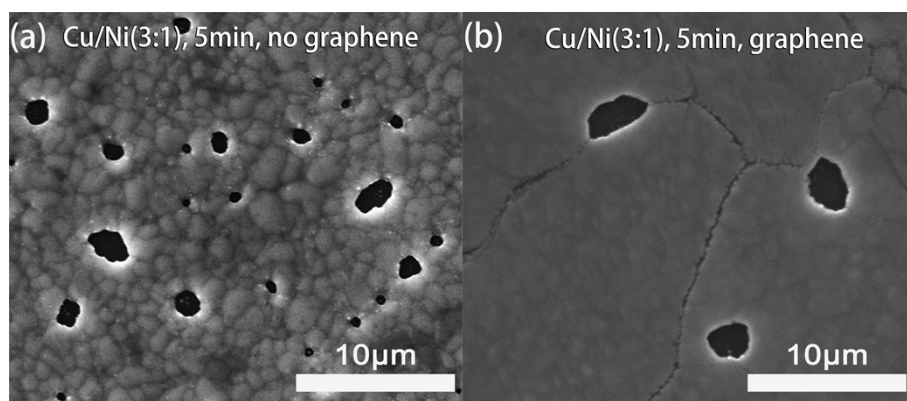

**Figure S4.** The SEM images of the samples after the CVD process (a) without and (b) with the introduction of  $\text{CH}_4$ , respectively.

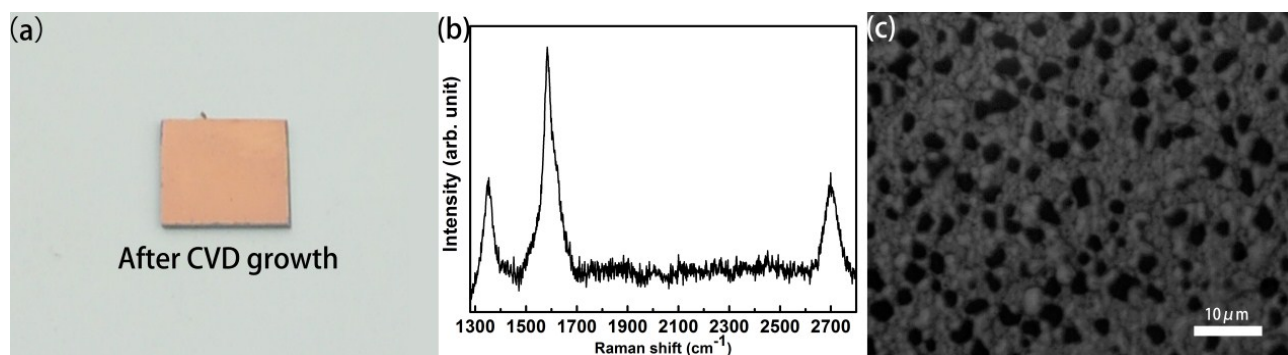

**Figure S5.** (a) The photo of Cu-coated Si substrate after graphene growth; (b) Typical Raman spectrum of the sample; (c) The SEM image of the sample surface.

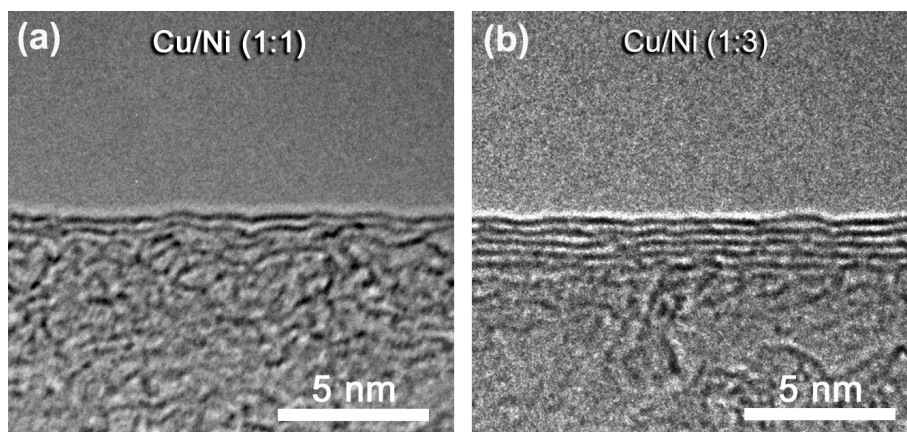

**Figure S6.** The TEM images of graphene grown on the Cu–Ni catalysts with the Cu/Ni composition of (a) 1:1 and (b) 1:3.
